# 1 Controls on the isotopic composition of microbial 2 methane

3 Jonathan Gropp,<sup>1\*</sup> Qusheng Jin,<sup>2</sup> Itay Halevy<sup>1</sup>

4 <sup>1</sup>Department of Earth and Planetary Sciences, Weizmann Institute of Science, Rehovot, Israel

5 <sup>2</sup>Department of Earth Sciences, University of Oregon, Eugene, Oregon, USA

6 \*To whom correspondence should be addressed; E-mail: [jonathan.gropp@weizmann.ac.il](mailto:jonathan.gropp@weizmann.ac.il).

## 7 Abstract

8 Microbial methane production (methanogenesis) is responsible for more than half of the  
9 annual emission of this major greenhouse gas to the atmosphere. Though the stable isotopic  
10 composition of methane is often used to characterize its sources and sinks, strictly empirical de-  
11 scriptions of the isotopic signature of methanogenesis currently limit such attempts. We devel-  
12 oped a biochemical-isotopic model of methanogenesis by CO<sub>2</sub> reduction, which predicts car-  
13 bon and hydrogen isotopic fractionations, and clumped isotopologue distributions, as functions  
14 of the cell's environment. We mechanistically explain multiple-isotopic patterns in laboratory  
15 and natural settings and show that such patterns constrain the in-situ energetics of methano-  
16 genesis. Combining our model with environmental data, we infer that in almost all marine  
17 environments and gas deposits, energy-limited methanogenesis operates close to chemical and  
18 isotopic equilibrium.

## 19 **Introduction**

20 Methane (CH<sub>4</sub>) is a major greenhouse gas, with both natural and anthropogenic sources (1). The  
21 primary natural source of biogenic methane emissions is archaeal methanogenesis in anoxic envi-  
22 ronments (2), about a third of which is hydrogenotrophic (reduction of CO<sub>2</sub> with dihydrogen, H<sub>2</sub>;  
23 Ref. 3). Strong isotopic discrimination during biological and abiotic methane formation has mo-  
24 tivated the use of methane hydrogen and carbon isotopes to trace its production and consumption  
25 processes, construct global methane budgets and evaluate its climatic impacts (1, 4, 5). Current  
26 organism-level models that rely on isotopic mass balance can explain part of the observed range  
27 of microbial isotopic discrimination (6–9), but to date, such models have prescribed rather than  
28 resolved the microbial biochemistry. It has been difficult, therefore, to distinguish between differ-  
29 ent methane sources, different modes and extents of environmental methane cycling, and different  
30 environmental controls on the microbial isotope discrimination as drivers of observed variations in  
31 the isotopic composition of methane. To constrain the microbial component of such variations, we  
32 developed and analyzed a full metabolic-isotopic model of hydrogenotrophic methanogenesis with  
33 the net reaction:

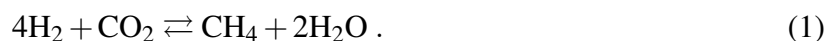

34 The model predicts the isotopic discrimination and its relation to the thermodynamic drive of this  
35 pathway (the Gibbs free energy of the net reaction,  $\Delta G_{\text{net}}$ ) and to cell-specific methanogenesis rates  
36 in laboratory cultures. Extending our analysis to energy-limited conditions, which are prevalent in  
37 natural environments, our model reveals the environmental and metabolic controls on the isotopic  
38 composition of methane.

## 39 **Results and Discussion**

### 40 **A metabolic model of hydrogenotrophic methanogenesis**

41 Accounting for the kinetics and thermodynamics of enzymatically-catalyzed reactions in hydrogenotrophic  
42 methanogenesis (details in the Methods and Supplementary Materials, SM), we constructed mass  
43 balance equations for the intracellular metabolites in the pathway (Fig. 1A). Given extracellular  
44 concentrations of  $\text{CO}_2$ ,  $\text{H}_2$  and  $\text{CH}_4$ , and pH, which define  $\Delta G_{\text{net}}$ , these equations are solved for the  
45 steady-state concentrations of the intracellular metabolites (fig. S1). At this steady state, the model  
46 links metabolite concentrations to the net rate of methanogenesis, and to the gross forward and  
47 reverse rates of the individual reactions. We calibrated our metabolic model to available measure-  
48 ments of specific methanogenesis rates and their relation to  $\text{H}_2$  concentrations in the  $\mu\text{M}$  to  $\text{mM}$   
49 range (fig. S2; SM). The metabolic model accounts for electron transfer from  $\text{H}_2$  to the intermediate  
50 metabolites through three electron carriers, cofactor  $\text{F}_{420}$ , coenzyme B (HS-CoB), and ferredoxin  
51 (Fd), thereby providing insight into the oxidation state of the cell. We validated the model's pre-  
52 dictions for the oxidation state of these electron carriers against available measurements. Fmd  
53 catalyzes the first step in the pathway,  $\text{CO}_2$  fixation to organic carbon with two electrons from an  
54 iron-sulfur-containing Fd (10). We found that to drive this reaction in the direction of net methano-  
55 genesis, Fd needs to be  $>90\%$  reduced, and that with decreasing  $\text{CO}_2$  concentrations, Fd must  
56 approach  $100\%$  reduced to compensate for the decreasing thermodynamic drive (fig. S1J). This is  
57 in line with previous estimates of the oxidation state of Fd for this reaction (11).  $\text{F}_{420}$  is  $0.1\%$   
58 reduced at low  $\text{H}_2$  concentrations, and up to  $100\%$  reduced at high  $\text{H}_2$  concentrations (fig. S1K), in  
59 agreement with observations from lab cultures (12). Coenzyme B (HS-CoB) is  $10\%$  reduced at low  
60  $\text{H}_2$  concentrations, and up to  $100\%$  reduced at high  $\text{H}_2$  concentrations (fig. S1L). The lower range is  
61 in agreement with observations of the oxidation state of HS-CoB at  $\mu\text{M}$  to  $1\text{ mM}$   $\text{H}_2$  concentrations  
62 (13). Our observation-validated model predictions suggest that the intracellular oxidation state of  
63 electron carriers generally does not reflect electrochemical equilibrium, and is instead maintained  
64 dynamically, by oxidation and reduction fluxes that depend on the cell's metabolic activity. This

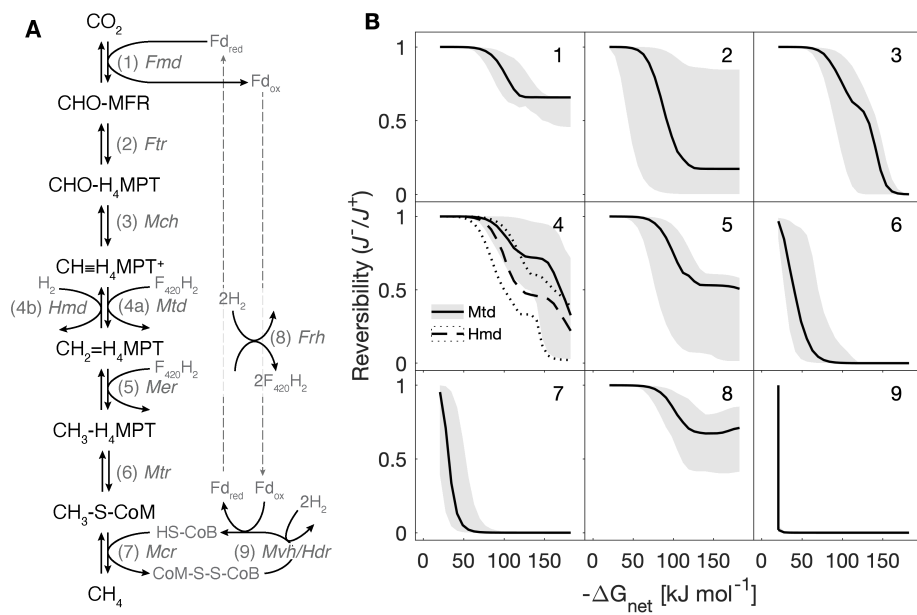

**Figure 1: A metabolic model of hydrogenotrophic methanogenesis.** (A) Schematic pathway. Abbreviated enzyme names are in italics (table S1). (B) Individual reaction reversibility ( $J_i^- / J_i^+$ ) against  $\Delta G_{net}$ . The subplots in panel B are numbered in accordance with panel A and table S1. The black lines are the median of 10<sup>3</sup> model simulations, and envelopes represent 95% of model results. The uncertainty originates from the enzyme kinetic parameters. Simulations were carried out at [H<sub>2</sub>] of 1 nM to 10 mM, and typical experimental [CO<sub>2</sub>] and [CH<sub>4</sub>] of 10 mM and 10 μM, respectively.

65 dynamic control means that measurements of the oxidation state of specific reduction-oxidation  
 66 couples does not necessarily bear on the oxidation state of other reduction-oxidation couples (both  
 67 inorganic and organic) and on the overall oxidation state of the cell.

68 The calibrated and validated biochemical model forms the basis for the metabolic-isotopic cou-  
 69 pling. With increasing H<sub>2</sub> concentrations,  $\Delta G_{net}$  becomes increasingly negative, and the individual  
 70 reactions in the pathway depart from equilibrium to various extents (Fig. 1B). We quantify the de-  
 71 parture from equilibrium by the individual reaction reversibility, defined as the ratio of the reverse  
 72 to forward gross rates of that reaction and related to its actual transformed Gibbs free energy ( $\Delta G_i'$ )  
 73 (14–16):

$$J_i^- / J_i^+ = \exp(\Delta G_i' / RT), \quad (2)$$

74 where R is the gas constant (J mol<sup>-1</sup> K<sup>-1</sup>), T is the temperature (K) and  $\Delta G_i' = \Delta G_r^0 + RT \ln Q$  (J  
 75 mol<sup>-1</sup>, where  $Q$  is the reaction quotient). For net forward methanogenesis rates, the reversibility

76 of individual reactions varies between zero (a near-unidirectional, kinetically controlled reaction)  
77 and unity (a near-equilibrium reaction). Some reactions do not fully depart from reversibility in  
78 the explored  $\Delta G_{\text{net}}$  space (e.g., the Frh-catalyzed reduction of F<sub>420</sub>), whereas others depart from  
79 reversibility at  $\Delta G_{\text{net}}$  as modestly negative as  $-15 \text{ kJ mol}^{-1}$  (e.g., the Mvh/Hdr, Mcr and Mtr-  
80 catalyzed reactions). This differential response is a combined function of the reaction thermo-  
81 dynamics, expressed as the standard-state transformed Gibbs free energy ( $\Delta G_i^{\prime 0}$ ), and the enzyme  
82 kinetics, specifically the metabolic rate capacity ( $V^+$ ) and Michaelis constants ( $K_M$ ). Neither  $\Delta G_i^{\prime 0}$   
83 nor  $V^+$  and  $K_M$  in isolation predict the pattern of differential departure from equilibrium—coupled  
84 thermodynamics and kinetics must be considered.

## 85 **An isotopic model calibrated to laboratory cultures**

86 The isotopic discrimination between substrate (*s*) and product (*p*) is described by the isotopic frac-  
87 tionation factor  ${}^r\alpha_{s/p} = {}^rR_s/{}^rR_p$ , where  ${}^{13}\text{R} = {}^{13}\text{C}/{}^{12}\text{C}$ ,  ${}^2\text{R} = \text{D}/\text{H}$  (with  $\text{D} \equiv {}^2\text{H}$  and  $\text{H} \equiv {}^1\text{H}$ ), and  
88 “*r*” denotes the rare isotope. The net isotopic fractionation expressed in an individual (bio)chemical  
89 reaction may vary between thermodynamic equilibrium and kinetic end-members, associated re-  
90 spectively with a reversible reaction and unidirectional forward reaction to form the reaction prod-  
91 uct. With the reversibilities calculated in the metabolic model and with values assigned to the  
92 equilibrium and kinetic isotopic fractionation factors (EFFs and KFFs, respectively) of the indi-  
93 vidual reactions, the net isotopic fractionation between the pathway substrates and products may  
94 be calculated (17, 18). We calibrated the relations between  $\Delta G_{\text{net}}$  and the resulting net carbon and  
95 hydrogen isotopic fractionations against experimental data, then used the calibrated model to de-  
96 termine the relation between  $\Delta G_{\text{net}}$  and the abundance of doubly substituted (“clumped”) methane  
97 isotopologues, which has yet to be systematically explored in experiments.

98 **Bulk carbon and hydrogen isotopic fractionation.** In laboratory cultures, the CO<sub>2</sub>–CH<sub>4</sub> carbon  
99 isotope fractionation ( ${}^{13}\epsilon_{\text{CO}_2\text{-CH}_4}$ , where  $\epsilon = 1 - \alpha$  [‰]) is inversely related to  $\Delta G_{\text{net}}$  (8, 19–23,  
100 fig. S3A). At near-zero  $\Delta G_{\text{net}}$ , the individual reactions in the pathway operate close to equilibrium

101 ( $J_i^-/J_i^+ \rightarrow 1$ ), and our model predicts  $^{13}\epsilon_{\text{CO}_2\text{-CH}_4}$  close to the temperature-dependent isotopic equi-  
102 librium fractionation ( $^{13}\epsilon_{\text{CO}_2\text{-CH}_4}^{\text{eq}}$ ). When  $\Delta G_{\text{net}}$  becomes slightly negative,  $^{13}\epsilon_{\text{CO}_2\text{-CH}_4}$  peaks to  
103 larger-than-equilibrium values of 80-100‰ at  $\approx -45 \text{ kJ mol}^{-1}$ , followed by a gradual decline to  
104  $\approx 30\%$  reached at  $\Delta G_{\text{net}}$  of  $\approx -120 \text{ kJ mol}^{-1}$  (Fig. 2A). Such larger-than-equilibrium  $^{13}\epsilon_{\text{CO}_2\text{-CH}_4}$   
105 values have been observed in several experimental and environmental datasets and have yet to be  
106 explained mechanistically. Our model reveals that this  $\Delta G_{\text{net}}\text{-}^{13}\epsilon_{\text{CO}_2\text{-CH}_4}$  relation is controlled by  
107 the landscape of departure from equilibrium of the individual reactions in the pathway. The car-  
108 bon reaction network in methanogenesis is linear. In such networks, near-unidirectionality of an  
109 individual reaction ( $J_i^-/J_i^+ \rightarrow 0$ ) leads to expression of that reaction's KFF and suppresses iso-  
110 topic fractionation associated with downstream reactions (18). The Mcr-catalyzed reaction's KFF  
111 ( $\approx 40\%$ , Ref. 24) is larger than its EFF ( $\approx 1\%$ , Ref. 25). As this reaction departs from equilibrium,  
112 the peak in  $^{13}\epsilon_{\text{CO}_2\text{-CH}_4}$  reflects a sum of its KFF and the EFFs of upstream reactions, with the ex-  
113 ception of the Mtr-catalyzed reaction, which also partially departs from equilibrium (Fig. 1B). The  
114 result is a larger-than-equilibrium  $^{13}\epsilon_{\text{CO}_2\text{-CH}_4}$  at modestly negative  $\Delta G_{\text{net}}$  values. The  $^{13}\epsilon_{\text{CO}_2\text{-CH}_4}$   
115 floor at  $\Delta G_{\text{net}}$  more negative than  $\approx -120 \text{ kJ mol}^{-1}$  (Fig. 2A) is defined by partial expression of the  
116 KFFs of Ftr and Fmd, and suppression of the isotopic fractionations associated with downstream  
117 reactions.

118 At large-negative  $\Delta G_{\text{net}}$  values  $^{13}\epsilon_{\text{CO}_2\text{-CH}_4}$  is sensitive also to the extracellular partial pressure  
119 of  $\text{CO}_2$  ( $p\text{CO}_2$ ). At a steady state, intracellular  $\text{CO}_2$  utilization is exactly matched by net  $\text{CO}_2$   
120 diffusion across the membrane. This net diffusive flux is the difference between large gross fluxes  
121 (into and out of the cell) when  $p\text{CO}_2$  is high, and smaller gross fluxes at lower  $p\text{CO}_2$ . Thus, the  
122 reversibility of net diffusion is low at low  $p\text{CO}_2$ , and suppression of downstream net carbon isotopic  
123 fractionation results in small  $^{13}\epsilon_{\text{CO}_2\text{-CH}_4}$  (also referred to as a “reservoir effect”). The dependence of  
124  $^{13}\epsilon_{\text{CO}_2\text{-CH}_4}$  on  $p\text{CO}_2$  explains the smallest net fractionations observed in laboratory cultures (lower  
125 bound of red envelope in Fig. 2B, Ref. 21), as well as the dependence of  $^{13}\epsilon_{\text{CO}_2\text{-CH}_4}$  on pH in  
126 hyperalkaline settings (26, 27).

127 The  $\text{CH}_4\text{-H}_2\text{O}$  hydrogen isotopic fractionation ( $^2\epsilon_{\text{CH}_4\text{-H}_2\text{O}}$ ) in laboratory cultures is  $\approx 200\%$

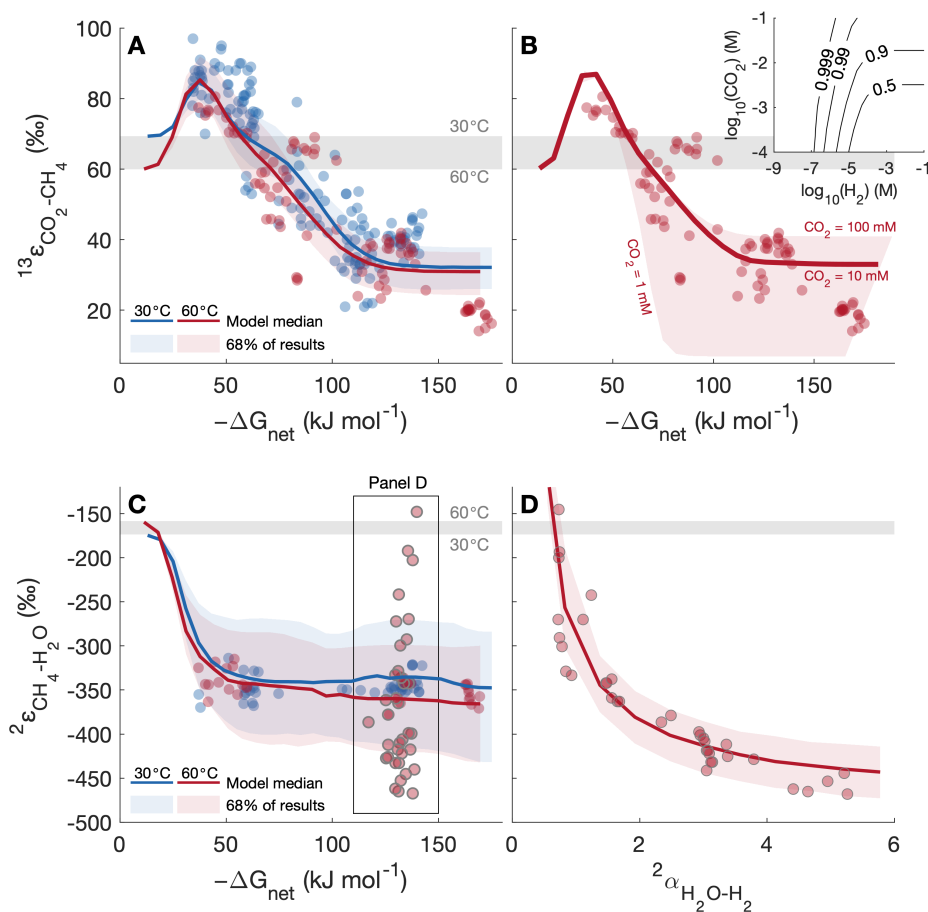

**Figure 2: Model-laboratory culture comparison of bulk carbon and hydrogen isotopic fractionation.** Mesophilic (30–40°C, blue circles) and thermophilic ( $\geq 55^\circ\text{C}$ , red circles) experimental data and model results (lines and envelopes) at 30°C (blue) and 60°C (red), and the equilibrium isotopic fractionation (gray envelopes). **(A, C)**  $^{13}\epsilon_{\text{CO}_2\text{-CH}_4}$  and  $^2\epsilon_{\text{CH}_4\text{-H}_2\text{O}}$  against  $\Delta G_{\text{net}}$ . **(B)**  $^{13}\epsilon_{\text{CO}_2\text{-CH}_4}$  against extracellular  $\text{CO}_2$  concentrations ( $[\text{CO}_{2(\text{out})}]$ ). Contours in the inset show the reversibility of cross-membrane  $\text{CO}_2$  diffusion. **(D)** Mixing effects on  $^2\epsilon_{\text{CH}_4\text{-H}_2\text{O}}$  as a function of the  $\text{H}_2\text{O}\text{-H}_2$  isotopic fractionation ( $^2\alpha_{\text{H}_2\text{O}\text{-H}_2}$ ), compared to laboratory culture data (8).

128 more negative than the temperature-dependent isotopic equilibrium fractionation ( $^2\epsilon_{\text{CH}_4\text{-H}_2\text{O}}^{\text{eq}}$ ), and  
 129 existing observations suggest that it does not display a clear dependence on  $\Delta G_{\text{net}}$  (8, 19, 22, 28,  
 130 29, fig. S3B). Unlike the linear carbon reaction network, the hydrogen reaction network has four  
 131 branches, each of which has the potential for hydrogen atom exchange between pathway inter-  
 132 mediates and  $\text{H}_2\text{O}$ . Therefore, departure from equilibrium of one of the hydrogen atom exchange  
 133 reactions does not preclude  $\text{CH}_4\text{-H}_2\text{O}$  hydrogen isotopic equilibrium. Specifically, the Mvh/Hdr-

134 catalyzed reaction is near-irreversible at  $\Delta G_{\text{net}}$  values as high as  $-25 \text{ kJ mol}^{-1}$  (Fig. 1B), yet at this  
135  $\Delta G_{\text{net}}$  value  ${}^2\epsilon_{\text{CH}_4\text{-H}_2\text{O}}$  is approximately equal to  ${}^2\epsilon_{\text{CH}_4\text{-H}_2\text{O}}^{\text{eq}}$  (Fig. 2C), and this arises from the high  
136 reversibility of the other hydrogen atom exchange reactions in the pathway. Only when the Mcr-  
137 and Mtr-catalyzed reactions sufficiently depart from reversibility (at  $\Delta G_{\text{net}} \leq -30 \text{ kJ mol}^{-1}$ ), cut-  
138 ting off  $\text{CH}_4$  and  $\text{HS-CoB}$  from exchange with upstream intermediates that are close to hydrogen  
139 isotope equilibrium with  $\text{H}_2\text{O}$ , does  ${}^2\epsilon_{\text{CH}_4\text{-H}_2\text{O}}$  depart from  ${}^2\epsilon_{\text{CH}_4\text{-H}_2\text{O}}^{\text{eq}}$  (Fig. 2C). At  $\Delta G_{\text{net}}$  more neg-  
140 ative than  $-40 \text{ kJ mol}^{-1}$  the KFFs of Mcr, Mtr and Mvh/Hdr control  ${}^2\epsilon_{\text{CH}_4\text{-H}_2\text{O}}$  (fig. S4). Overall,  
141 our model reveals a clear  ${}^2\epsilon_{\text{CH}_4\text{-H}_2\text{O}}\text{-}\Delta G_{\text{net}}$  relation, which has not been accessed by the range of  
142  $\Delta G_{\text{net}}$  explored in laboratory cultures to date. The apparent invariance of  ${}^2\epsilon_{\text{CH}_4\text{-H}_2\text{O}}$  at  $\Delta G_{\text{net}}$  more  
143 negative than  $-40 \text{ kJ mol}^{-1}$  represents a complex,  $\Delta G_{\text{net}}$ -dependent combination of isotope effects  
144 associated with the enzymes in the pathway.

145 The hydrogen atom added to  $\text{CH-H}_4\text{MPT}$  may come from  $\text{H}_2\text{O}$  in the Mtd-catalyzed reaction,  
146 or from  $\text{H}_2$  in the Hmd-catalyzed reaction (Fig. 1A; 30). Thus, up to one quarter of the hydrogen  
147 atoms in methane may come from  $\text{H}_2$ , depending on the relative activity of Mtd and Hmd. High  
148  $\text{H}_2$  concentrations favor high methanogenesis rates and Hmd activity. Under these conditions, and  
149 especially in the case of  $\text{H}_2\text{-H}_2\text{O}$  isotopic disequilibrium,  ${}^2\epsilon_{\text{CH}_4\text{-H}_2\text{O}}$  may vary in response to vari-  
150 ations in the hydrogen isotopic composition of  $\text{H}_2$ . Our model captures this behavior, as observed  
151 in culture experiments with  $1 \text{ mM } [\text{H}_2]$  and at  $60^\circ\text{C}$  (8, 29), displaying  ${}^2\epsilon_{\text{CH}_4\text{-H}_2\text{O}}$  values between  
152  $-145\%$  and  $-480\%$ , which inversely covary with the  $\text{H}_2\text{O-H}_2$  isotopic fractionation (Fig. 2D).

153 Our predicted trajectories for departure from equilibrium  ${}^{13}\epsilon_{\text{CO}_2\text{-CH}_4}$  and  ${}^2\epsilon_{\text{CH}_4\text{-H}_2\text{O}}$  values may  
154 explain observations of near-equilibrium  ${}^{13}\epsilon_{\text{CO}_2\text{-CH}_4}$  values concurrent with clearly disequilibrium  
155  ${}^2\epsilon_{\text{CH}_4\text{-H}_2\text{O}}$  values, which have been previously explained by a decoupling of the carbon and hydro-  
156 gen isotopic systems in methanogenesis (8, 31). We suggest instead, that the measured  ${}^{13}\epsilon_{\text{CO}_2\text{-CH}_4}$   
157 values did not reflect isotopic equilibrium, but the descending branch from the  ${}^{13}\epsilon_{\text{CO}_2\text{-CH}_4}$  maxi-  
158 mum (which occurs at  $\Delta G_{\text{net}} \approx -40 \text{ kJ mol}^{-1}$ ) with increasingly negative  $\Delta G_{\text{net}}$ . In other words, we  
159 suggest that apparent equilibrium  ${}^{13}\epsilon_{\text{CO}_2\text{-CH}_4}$  values may emerge by a fortuitous combination of  
160 EFFs and KFFs, and not due to actual isotopic equilibrium between  $\text{CO}_2$  and  $\text{CH}_4$ .



161 **Clumped isotopologue distributions.** The abundances of the doubly substituted isotopologues  
162 of CH<sub>4</sub> (<sup>13</sup>CH<sub>3</sub>D and <sup>12</sup>CH<sub>2</sub>D<sub>2</sub>) are expressed as a deviation from their concentrations at a stochas-  
163 tic distribution of the rare isotopes, with  $\Delta^{13}\text{CH}_3\text{D} = {}^{13,2}R_{\text{sample}}/{}^{13,2}R_{\text{stochastic}} - 1$  [‰] and  $\Delta^{12}\text{CH}_2\text{D}_2$   
164  $= {}^{2,2}R_{\text{sample}}/{}^{2,2}R_{\text{stochastic}} - 1$  [‰]. Both  $\Delta^{13}\text{CH}_3\text{D}$  and  $\Delta^{12}\text{CH}_2\text{D}_2$  values depend on the methane  
165 formation temperature (6), yet applications of methane clumped isotopes to constrain its formation  
166 temperature and mechanism are complicated by source mixing and disequilibrium effects (7, 32).  
167 The dependence of  $\Delta^{13}\text{CH}_3\text{D}$  and  $\Delta^{12}\text{CH}_2\text{D}_2$  on  $\Delta G_{\text{net}}$  has not been determined experimentally, and  
168 similar to bulk carbon isotopes, our model predicts non-monotonic departure from clumped isotopic  
169 equilibrium (fig. S5), unlike previous estimates of these relations (7, 33). As  $\Delta G_{\text{net}}$  becomes nega-  
170 tive, both  $\Delta^{13}\text{CH}_3\text{D}$  and  $\Delta^{12}\text{CH}_2\text{D}_2$  values decrease from the expected equilibrium compositions,  
171 and  $\Delta^{12}\text{CH}_2\text{D}_2$  becomes anti-clumped (i.e., < 0‰) due to expression of the KFFs of the Mcr- and  
172 Mtr-catalyzed reactions (fig. S5). After the initial decrease in  $\Delta^{13}\text{CH}_3\text{D}$  and  $\Delta^{12}\text{CH}_2\text{D}_2$ , both in-  
173 crease with increasingly negative  $\Delta G_{\text{net}}$ , and  $\Delta^{13}\text{CH}_3\text{D}$  increases to values almost as high as the  
174 equilibrium values. This behavior has two implications. First, there is a range of  $\Delta G_{\text{net}}$  ( $\approx -75$  to  
175  $-55 \text{ kJ mol}^{-1}$ ) over which  $\Delta^{13}\text{CH}_3\text{D}$  values may give the false appearance of proximity to isotopic  
176 equilibrium. Second, there is a range of  $\Delta G_{\text{net}}$  ( $\approx -100$  to  $-20 \text{ kJ mol}^{-1}$ ) over which  $\Delta^{13}\text{CH}_3\text{D}$  and  
177  $\Delta^{12}\text{CH}_2\text{D}_2$  cannot uniquely constrain the energetic state of the cell (e.g.,  $\Delta^{13}\text{CH}_3\text{D}$  is  $\approx 4$  ‰ at both  
178  $\Delta G_{\text{net}}$  of  $\approx -20$  and  $\approx -70 \text{ kJ mol}^{-1}$ ). However, in combination with  ${}^{13}\epsilon_{\text{CO}_2\text{-CH}_4}$  and  ${}^2\epsilon_{\text{CH}_4\text{-H}_2\text{O}}$  data,  
179 the position in the  $\Delta G_{\text{net}}$  landscape and the degree of departure from equilibrium may be uniquely  
180 constrained (Fig. 3). The multiple-isotope composition of methane (i.e., bulk carbon and hydro-  
181 gen, and clumped isotopes) may thus be a useful proxy for  $\Delta G_{\text{net}}$  in natural environments where  
182 measurements of H<sub>2</sub>, CO<sub>2</sub> and CH<sub>4</sub> concentrations are not easily obtainable. In addition to de-  
183 parture from equilibrium of the Mcr- and Mtr-catalyzed reactions, which may cause anti-clumped  
184  $\Delta^{12}\text{CH}_2\text{D}_2$  compositions, a testable prediction of our model is that the Hmd-catalyzed reaction  
185 may also cause anti-clumping. This arises from combinatorial effects (34–36) when Hmd activity  
186 is high, and especially during H<sub>2</sub>-H<sub>2</sub>O hydrogen isotopic disequilibrium (fig. S6).

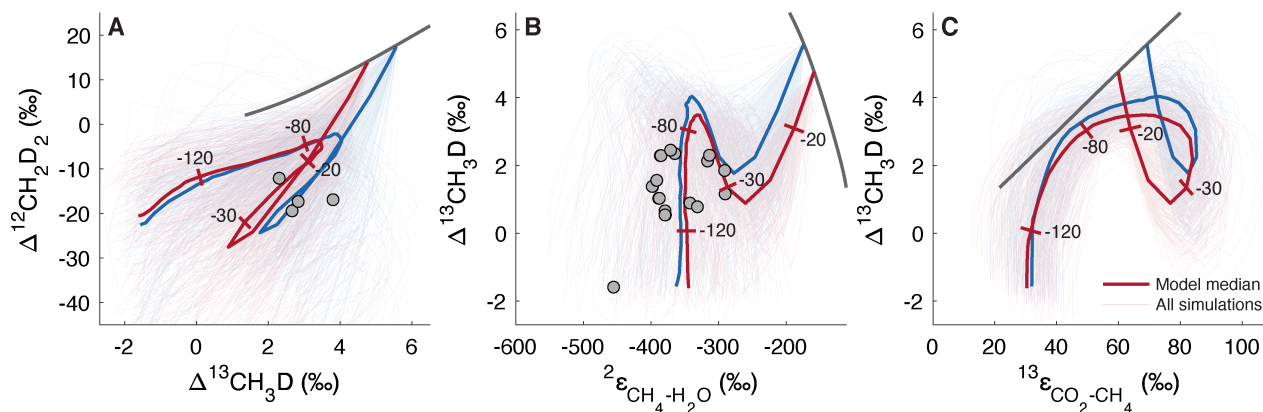

**Figure 3: Model-laboratory culture comparison of clumped isotopologue abundances.** Experimental data (gray circles) and model results (thin lines) of 200 simulations at 30°C (blue) and 60°C (red). The dark gray lines represent temperature-dependent isotopic equilibrium at 0-350°C, and the thick red and blue lines show the median of the individual simulations, with tickmarks at  $\Delta G_{\text{net}}$  values of  $-20$ ,  $-30$ ,  $-80$ , and  $-120$   $\text{kJ mol}^{-1}$ . (A)  $\Delta^{13}\text{CH}_3\text{D}$  against  $\Delta^{12}\text{CH}_2\text{D}_2$ . (B)  $\Delta^{13}\text{CH}_3\text{D}$  against  ${}^2\epsilon_{\text{CH}_4\text{-H}_2\text{O}}$ . (C)  $\Delta^{13}\text{CH}_3\text{D}$  against  ${}^{13}\epsilon_{\text{CO}_2\text{-CH}_4}$ . Laboratory culture samples are from hydrogenotrophic methanogens that do not have membrane-associated methanophenazines.

## 187 Isotopic fractionation in energy-limited environments

188 The metabolic-isotopic model may be used to examine the controls on the isotopic fractionation  
 189 of methanogenesis not only in laboratory cultures, but in natural environments as well. Labora-  
 190 tory cultures operate far from equilibrium, usually at  $\text{H}_2$  concentrations and cell-specific methano-  
 191 genesis rates (csMR) much higher than those in natural environments (table S5; fig. S9). Recent  
 192 reevaluations of slowly forming biogenic methane sources such as marine sediments, coalbeds or  
 193 shale gas deposits, revealed that apparent  $\text{CH}_4\text{-CO}_2$  and  $\text{CH}_4\text{-H}_2\text{O}$  isotopic equilibrium is com-  
 194 mon (8, 25, 37–40). There are currently no laboratory cultures that reproduce the isotopic effects  
 195 associated with these conditions. We modified the model to use enzyme activities that were mea-  
 196 sured in  $\text{H}_2$ -limited laboratory cultures (Methods) and assessed the resulting  $\Delta G_{\text{net}}$ –csMR–isotopic  
 197 relations at 0-60°C.

198 Existing estimates of environmental  $\Delta G_{\text{net}}$  are more positive than  $-30$   $\text{kJ mol}^{-1}$  (table S5).  
 199 However, the determination of  $\Delta G_{\text{net}}$  in natural environments is often difficult because of low and  
 200 spatially heterogeneous in-situ  $\text{H}_2$  concentrations (41–43), and the actual range of  $\Delta G_{\text{net}}$  likely  
 201 reflects this heterogeneity. As  $\Delta G_{\text{net}}$  determines the csMR (fig. S9), which is easier to measure,

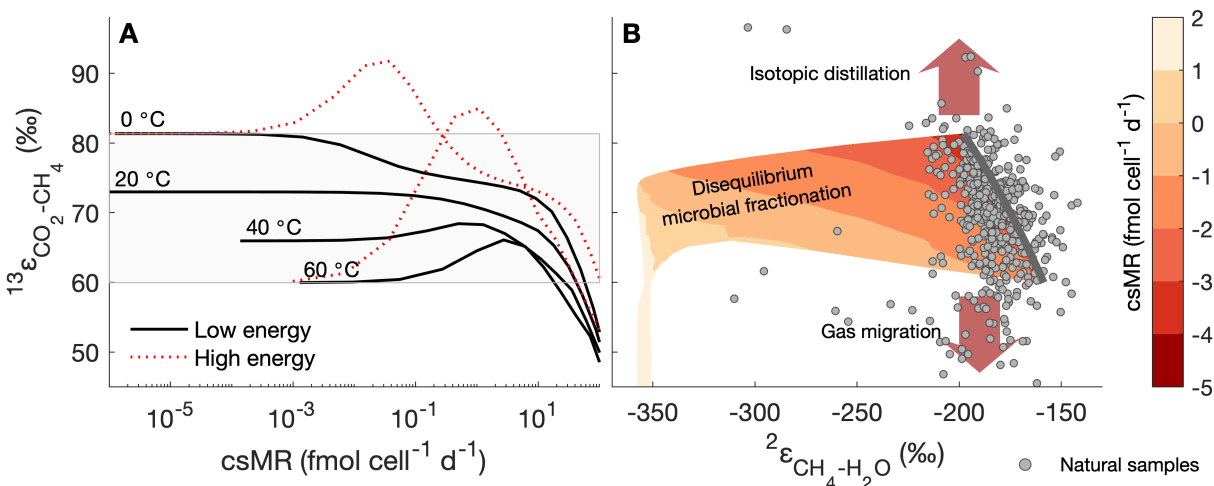

**Figure 4: Isotopic fractionation during methanogenesis in energy-limited conditions.** (A)  $^{13}\epsilon_{\text{CO}_2\text{-CH}_4}$  against cell-specific methanogenesis rate (csMR). Dotted red lines show the laboratory-calibrated model (high energy) results for the same temperatures. (B)  $^{13}\epsilon_{\text{CO}_2\text{-CH}_4}$  against  $^2\epsilon_{\text{CH}_4\text{-H}_2\text{O}}$ . Contours are  $\log_{10}(\text{csMR})$  predicted by our model, between 0°C and 60°C. The calculations are for  $[\text{H}_2]$  between 1 nM and 5  $\mu\text{M}$ ,  $[\text{CO}_2]$  and  $[\text{CH}_4]$  of 1 mM, and a cell volume of 1  $\mu\text{m}^3$ . The circles are biogenic environmental samples from marine sediments, coalbed methane and natural gas deposits ( $n = 491$ ).

we henceforth discuss csMR–isotopic fractionation relations. Our model predictions of csMR in energy-limited environments ( $10^{-5}$  to  $10^0$  fmol cell<sup>-1</sup> d<sup>-1</sup>) are considerably lower than the typical range in laboratory cultures ( $10^1$  to  $10^4$  fmol cell<sup>-1</sup> d<sup>-1</sup>, fig. S9, Refs. 23, 29, 44). This csMR difference of several orders of magnitude reflects the model calibration to reproduce H<sub>2</sub>–csMR relations in low-H<sub>2</sub> laboratory culture experiments (fig. S2). Although this calibration was limited to available experimental H<sub>2</sub> concentrations higher than 1  $\mu\text{M}$ , our predicted csMR values at  $\sim\text{nM}$  H<sub>2</sub> concentrations ( $10^{-5}$  to  $10^0$  fmol cell<sup>-1</sup> d<sup>-1</sup>) overlap with the range of csMR values from shallow and deep marine sediments ( $10^{-4}$  to  $10^0$  fmol cell<sup>-1</sup> d<sup>-1</sup>), which we calculated from reported bulk methanogenesis rates and cell densities (table S6). We note that there is large uncertainty regarding these environmental csMR values, which stems in part from uncertainty on the net rate of methanogenesis. The methanogenesis rate in natural environments is often determined by radiotracer assays, which may lead to an overestimation of the net methanogenesis rate by orders of magnitude if the reversibility of net methanogenesis (i.e., between CO<sub>2</sub> and CH<sub>4</sub>) is higher than 0.9 (SM). An additional source of uncertainty is the number of active methanogenic cells in the sedi-

216 ments, and there are currently very limited estimates of these values. Despite these uncertainties,  
217 our model predictions of csMR match not only environmental csMR estimates, but also estimates  
218 of cell-specific power utilization,  $P = -\Delta G_{\text{net}} \times \text{csMR}$  [ $\text{W cell}^{-1}$ ]. We predict  $P$  between  $10^{-22}$   
219 and  $10^{-18}$   $\text{W cell}^{-1}$  for  $\Delta G_{\text{net}}$  between  $-10$  to  $-30$   $\text{kJ mol}^{-1}$  respectively, at  $10^\circ\text{C}$ , in agreement  
220 with previously estimated cell-specific power utilization in marine sediments (45).

221 The model reveals that in contrast to methanogenesis in lab cultures, under energy-limited  
222 conditions the Mtr-catalyzed reaction departs from equilibrium before the Mcr-catalyzed reac-  
223 tion (fig. S7). As a consequence, different csMR–fractionation relations emerge, most notably  
224 for  $^{13}\epsilon_{\text{CO}_2\text{-CH}_4}$  (Fig. 4A). Instead of an increase in  $^{13}\epsilon_{\text{CO}_2\text{-CH}_4}$  to larger-than-equilibrium values,  
225  $^{13}\epsilon_{\text{CO}_2\text{-CH}_4}$  remains approximately constant up to csMR of  $\sim 10$   $\text{fmol cell}^{-1} \text{d}^{-1}$ . The reason for  
226 this apparent carbon isotopic equilibrium is the similar magnitude of the EFF and KFF of Mtr  
227 ( $17\%$  and  $16\%$  at  $60^\circ\text{C}$ , respectively, fig. S4). Thus, as the Mtr-catalyzed reaction departs from  
228 equilibrium, the net carbon isotopic fractionation changes little. An environmental prediction of  
229 the above is that  $^{13}\epsilon_{\text{CO}_2\text{-CH}_4}$  that differs measurably from  $^{13}\epsilon_{\text{CO}_2\text{-CH}_4}^{\text{eq}}$  indicates csMR higher than  
230  $\sim 10$   $\text{fmol cell}^{-1} \text{d}^{-1}$ .

231 Analytically distinguishable departure of  $^2\epsilon_{\text{CH}_4\text{-H}_2\text{O}}$  from equilibrium occurs at csMR between  
232  $\sim 0.001$  and  $0.1$   $\text{fmol cell}^{-1} \text{d}^{-1}$  (at  $0^\circ\text{C}$  and  $60^\circ\text{C}$ , respectively; fig. S8B), and departure from  
233 clumped isotope equilibrium occurs over a similar range of csMR (fig. S8C, D). Thus, our model  
234 reveals that at csMR between  $0.1$  and  $10$   $\text{fmol cell}^{-1} \text{d}^{-1}$ , one might expect near-equilibrium  
235  $^{13}\epsilon_{\text{CO}_2\text{-CH}_4}$  concurrent with disequilibrium  $^2\epsilon_{\text{CH}_4\text{-H}_2\text{O}}$ . The opposite situation (i.e., near-equilibrium  
236  $^2\epsilon_{\text{CH}_4\text{-H}_2\text{O}}$  and disequilibrium  $^{13}\epsilon_{\text{CO}_2\text{-CH}_4}$ ) is common in natural environments, though csMR is  
237 usually unknown (fig. S9). As suggested in previous studies, this apparent hydrogen isotopic equi-  
238 librium concurrent with carbon isotopic disequilibrium may be explained by diffusive mixing of  
239  $\text{CO}_2$  and  $\text{CH}_4$ , isotopic (Rayleigh) distillation, or diagenetic isotope exchange without net methane  
240 production (Fig. 4B; 8, 38, 46, 47). If disequilibrium  $^{13}\epsilon_{\text{CO}_2\text{-CH}_4}$  is explained as above rather  
241 than by microbial expression of KFFs, then the scarcity of data within the field representing dis-  
242 equilibrium microbial fractionation in Fig. 4B may reflect near-equilibrium isotopic fractionation

243 during methanogenesis in energy-limited environments. This implies csMR lower than  $\sim 0.001$ –  
244  $0.1 \text{ fmol cell}^{-1} \text{ d}^{-1}$  (depending on temperature), consistent with almost all csMR estimated from  
245 cell abundances and volumetric methanogenesis rates (SM, table S6). In energy-limited environ-  
246 ments with higher csMR, near-equilibrium  ${}^2\epsilon_{\text{CH}_4\text{-H}_2\text{O}}$  concurrent with disequilibrium  ${}^{13}\epsilon_{\text{CO}_2\text{-CH}_4}$   
247 may be explained by methane cycling or anaerobic oxidation of methane that operates close to the  
248 thermodynamic limit of this metabolism (48).

## 249 Conclusions

250 By accounting for the metabolites and reactions in the hydrogenotrophic methanogenesis path-  
251 way, we link environmental substrate and product concentrations, pH and temperature to the en-  
252 ergetics and net rate of methanogenesis, and to the associated fractionation of carbon, hydrogen  
253 and clumped isotopes. The landscape of departure of individual reactions in the pathway from  
254 reversibility controls these fractionations, explaining rate–fractionation relations in laboratory cul-  
255 tures. We suggest that a combination of  ${}^{13}\epsilon_{\text{CO}_2\text{-CH}_4}$ ,  ${}^2\epsilon_{\text{CH}_4\text{-H}_2\text{O}}$ ,  $\Delta^{13}\text{CH}_3\text{D}$  and  $\Delta^{12}\text{CH}_2\text{D}_2$  data,  
256 interpreted within a metabolic-isotopic model framework, can uniquely constrain the in-situ ener-  
257 getics of methanogenic activity (i.e., the actual  $\Delta G_{\text{net}}$  of methanogenesis), which may be difficult to  
258 constrain by other means. However, application of such an approach is limited to natural and arti-  
259 ficial environments in which methane production dominates the processes that may affect apparent  
260  $\text{CH}_4\text{-CO}_2$  and  $\text{CH}_4\text{-H}_2\text{O}$  isotopic fractionations. Such processes include  $\text{CO}_2$  and  $\text{CH}_4$  diffusion,  
261 isotopic distillation and methane cycling, which are prevalent in natural environments. Neverthe-  
262 less, the mechanistic understanding of isotopic effects during microbial methanogenesis provided  
263 by our model allows an inference that this metabolism operates close to chemical and isotopic equi-  
264 librium in a wide range of natural environments, including marine sediments, coal beds and natural  
265 gas deposits.

## 266 **Methods**

### 267 **Relating net isotopic fractionation to thermodynamic drive**

268 The metabolic-isotopic model that we developed is based on a general framework, previously used  
269 to investigate sulfur isotopes in microbial sulfate-reduction (17, 18). This approach is applicable to  
270 any metabolic network with some modifications that we present below. In general, the net flux of  
271 a reversible enzymatically catalyzed reaction ( $J$ ) is defined by the difference between the forward  
272 ( $J^+$ ) and backward ( $J^-$ ) gross fluxes, and can be expressed as (16):

$$J = J^+ - J^- = V^+ \times \left( \frac{\prod_j ([r_j] / K_{M_j})^{n_j}}{1 + \prod_j ([r_j] / K_{M_j})^{n_j} + \prod_i ([p_i] / K_{M_i})^{m_i}} \right) \times \left( 1 - e^{\Delta G_i^0 / RT} \right), \quad (3)$$

273 where  $V^+$  is the maximal rate capacity of the enzyme (defined by  $[E] \times k_{cat}^+$ , where  $k_{cat}^+$  is the  
274 catalytic rate constant for forward reaction),  $[r_j]$  and  $[p_i]$  are concentrations of the  $i$ th reactant and  
275  $j$ th product, respectively, and  $K_{M_j}$  and  $K_{M_i}$  are the Michaelis constants for the forward and reverse  
276 directions, respectively. The  $n_i$  and  $m_j$  stand for the stoichiometry of the reactant and product,  
277 respectively. A net flux, as described by Eq. 3, is calculated for each of the reactions in the  
278 hydrogenotrophic methanogenesis pathway (table S1). These fluxes are used to construct a mass  
279 balance, which is solved at a steady-state to find the concentrations of the metabolites. The steady-  
280 state solution was obtained by forward integration using ode15s, an ordinary differential equation  
281 solver in MATLAB<sup>®</sup>. As metabolite concentrations span 6 to 7 orders of magnitude, the resulting  
282 set of differential equations is stiff, and required the use of this solver with an absolute tolerance of  
283  $10^{-20}$  M. We checked that the duration of integration was sufficient to reach a steady-state solution  
284 (i.e., no change in concentrations and fluxes) in all cases.

285 The model's inputs include the environmental temperature, pH and extracellular aqueous con-  
286 centrations of  $H_2$ ,  $CO_2$  and  $CH_4$ . We assume that the intracellular concentrations of  $H_2$  and  $CH_4$   
287 are equal to the extracellular concentrations due to their rapid diffusion through the membrane.  
288 For  $CO_2$  we apply a simple diffusion model to relate intracellular to extracellular  $CO_2$  concentra-  
289 tions. The model's tunable parameters include enzyme kinetic constants ( $K_M$  and  $V^+$ ), thermody-  
290 namic constants ( $\Delta G_i^0$ ) and cellular parameters such as cell size, and concentrations of some of

291 the metabolites. We elaborate on the parameters and the choice of their values in the SM. With  
292 the inputs prescribed and values for the tunable parameters chosen, the model outputs are the con-  
293 centrations of all intracellular metabolites and the gross fluxes among these metabolites, which are  
294 related to the reactions in the methanogenesis pathway.

295 We used the forward and backward gross fluxes from the metabolic model to calculate the  
296 net isotopic fractionations in hydrogenotrophic methanogenesis. To this end, we constructed a  
297 mass balance for each isotopic system (for both bulk and clumped isotopes), which is based on  
298 calculating an isotopic flux associated with each of the chemical fluxes. For the schematic reaction  
299  $r \rightarrow p$ , this isotopic flux can be approximated:

$$F_{rp} = J_{rp}^+ R_r \alpha_{rp,r} , \quad (4)$$

300 where  $J_{rp}^+$  is the forward chemical flux between metabolites pools  $r$  and  $p$ ,  $R_r$  is the abundance  
301 ratio of heavy to light isotopes in pool  $r$ , and  $\alpha_{rp,r}$  is the KFF of the reaction. A term similar to  
302 Eq. 4 was assigned to account for the consumption and production of each isotopologue in the  
303 pathway while considering the stoichiometry and the symmetry coefficients, where relevant, in a  
304 similar manner to previous model derivations (7, 9). As described above, these terms were used  
305 to construct isotopic mass balances in the form of a set of coupled differential equations, which  
306 were solved numerically using the ode15s solver in MATLAB<sup>®</sup> to obtain the steady-state bulk and  
307 clumped isotopic composition of all intracellular metabolites, given bulk extracellular D/H and  
308  $^{13}\text{C}/^{12}\text{C}$  of  $\text{H}_2\text{O}$  and  $\text{CO}_2$ , respectively.

309 The net isotopic fractionation in linear metabolic networks such as the carbon reaction network  
310 in hydrogenotrophic methanogenesis can be solved analytically. For example, in the case of the  
311 reaction  $r \rightleftharpoons p$ , the net isotopic fractionation between the metabolite pools of  $r$  and  $p$  ( $\alpha_{r,p}^{net}$ ) can be  
312 calculated by:

$$\alpha_{r,p}^{net} = (\alpha_{r,p}^{eq} - \alpha_{r,rp}) \times (J_{pr}^- / J_{rp}^+) + \alpha_{r,rp} , \quad (5)$$

313 where  $\alpha_{r,p}^{eq}$  is the EFF between pools  $r$  and  $p$ ,  $\alpha_{r,rp}$  is 1/KFF of the forward reaction. A full deriva-  
314 tion for this term is presented in Wing and Halevy, 2014 (18). The reversibility  $J_{pr}^- / J_{rp}^+$  is directly

315 related to  $\Delta G'_i$  through the flux-force relationship (Eq. 2). In the case of longer linear reaction  
316 networks such as  $s \rightleftharpoons r \rightleftharpoons p$ , the net isotopic fractionation can be described by:

$$\alpha_{s,p}^{net} = (\alpha_{r,p}^{net} \times \alpha_{s,r}^{eq} - \alpha_{s,sr}) \times (J_{rs}^- / J_{sr}^+) + \alpha_{s,sr}. \quad (6)$$

317 This expression can be expanded recursively to describe the net isotopic fractionation in a linear  
318 reaction network of arbitrary length (18). Such a recursive expression has the advantage of a signif-  
319 icantly reduced computational time compared to the numerical solution that is used for nonlinear  
320 reaction networks. We verified that this analytical solution yields identical results to the numerical  
321 solution for the net carbon isotopic fractionation.

## 322 **Isotopic model parameters**

323 To calculate the net isotopic fractionations associated with each of the steps in the methanogenesis  
324 pathway we used the temperature-dependent EFFs which were calculated for the hydrogenotrophic  
325 pathway (25, 49). The KFFs were determined experimentally only for Mcr (24). To account for  
326 missing KFFs we randomly sampled their values from prior uniform distributions  $10^6$  times. We  
327 included both primary and secondary isotopic effects ( $\alpha_p$  and  $\alpha_s$ , respectively). Primary isotopic  
328 effects are due to the breaking or formation of a bond directly with the atom of interest, and sec-  
329 ondary isotopic effects are due to breaking or formation of an adjacent bond. Secondary KFFs are  
330 usually smaller than primary KFFs. We weighted the combinations of KFFs drawn from the prior  
331 distributions by the model-experimental mismatch, expressed as the inverse of the square of sum of  
332 the square errors ( $1/SSE^2$ ), to generate posterior distributions of the KFFs, which were then used  
333 in the model. The selection of prior KFF value distributions is described in the SM.

334 The posterior distributions of the KFFs (fig. S4) serve as a sensitivity analysis of the model.  
335 Posterior distributions that are similar to the prior distributions indicate insensitivity to the model  
336 parameter, in this case, the KFF value. For carbon isotopes, the model shows sensitivity to the KFFs  
337 of Fmd, Ftr and Mtr with smallest-mismatch values of 30.8‰, 25.8‰, and 15.8‰ at mesophilic  
338 conditions, respectively. This sensitivity is in line with our observations of the reactions that de-  
339 termine the trajectory of  $^{13}\epsilon_{\text{CO}_2\text{-CH}_4}$  departure from equilibrium. For hydrogen isotopes, the model



340 shows sensitivity to most of the primary KFFs, and to the secondary KFF of Mtr. Notably, the pri-  
341 mary KFFs of Mtd, Mer and Frh tend to be small (i.e., closer to unity), with median values between  
342  $\approx -450\%$  and  $\approx -300\%$ , but larger than the secondary KFFs with median values between  $\approx -330\%$   
343 and  $\approx -220\%$ .

## 344 **Simulating methanogenesis in energy-limited conditions**

345 The metabolic parameters that we used to explore isotopic fractionation in methanogenesis were  
346 curated from cell cultures grown under optimal conditions. However, methanogens tightly regulate  
347 gene expression under energy-limiting conditions, resulting in shifts in enzyme specific activities  
348 (30, 50–57). Specifically, prolonged H<sub>2</sub> limitation promotes higher activities of Frh, Mvh/Hdr and  
349 the Mcr I isoenzyme, in parallel to a decrease in the activity of Mcr II (52, 53, 58). Mcr I has  
350 a higher affinity to the substrates CH<sub>3</sub>-SCoM and HS-CoB relative to Mcr II, allowing the cells  
351 to increase the cell-specific respiration rate when H<sub>2</sub> becomes limiting (59–61). Therefore, in the  
352 simulations of methanogenesis in natural, energy-limited environments we used enzyme activities  
353 measured in crude extracts from cells that were grown under conditions favoring Mcr I activity (53)  
354 with  $K_M$  values of Mcr I (table S2). In laboratory cultures, cells under energy limitation decrease  
355 their volume in a matter of days or weeks, and a similar phenomenon was observed when comparing  
356 cell communities in energy-replete vs. energy-deprived environmental settings (62). Thus, we use  
357 a cellular volume smaller by a factor of two from the default value (2 fL cell<sup>-1</sup> vs. 1 fL cell<sup>-1</sup>).

## 358 **Acknowledgments**

359 J.G. acknowledges support from the Sustainability and Energy Research Initiative (SAERI) of the  
360 Weizmann Institute of Science. Q.J. is supported by NSF award EAR-1636815.

## 361 **Author contributions**

362 J.G. and I.H. conceived the study, developed and analyzed the metabolic-isotopic model, and wrote  
363 the initial draft. Q.J. developed the metabolic model. All authors contributed to the writing.

## 364 **References**

- 365 [1] M. Saunois, *et al.*, The global methane budget 2000–2012. *Earth Syst. Sci. Data* **8**, 697–751  
366 (2016).
- 367 [2] S. Schwietzke, O. A. Sherwood, L. M. P. Bruhwiler, J. B. Miller, G. Etiope, E. J. Dlugokencky,  
368 S. E. Michel, V. A. Arling, B. H. Vaughn, J. W. C. White, P. P. Tans, Upward revision of global  
369 fossil fuel methane emissions based on isotope database. *Nature* **538**, 88–91 (2016).
- 370 [3] Z. Lyu, N. Shao, T. Akinyemi, W. B. Whitman, Methanogenesis. *Current Biology* **28**, R727-  
371 R732 (2018).
- 372 [4] M. J. Whiticar, Carbon and hydrogen isotope systematics of bacterial formation and oxidation  
373 of methane. *Chem. Geol.* **161**, 291–314 (1999).
- 374 [5] E. G. Nisbet, E. J. Dlugokencky, M. R. Manning, D. Lowry, R. E. Fisher, J. L. France, S. E.  
375 Michel, J. B. Miller, J. W. C. White, B. Vaughn, P. Bousquet, J. A. Pyle, N. J. Warwick,  
376 M. Cain, R. Brownlow, G. Zazzeri, M. Lanoisellé, A. C. Manning, E. Gloor, D. E. J. Worthy,  
377 E.-G. Brunke, C. Labuschagne, E. W. Wolff, A. L. Ganesan, Rising atmospheric methane:  
378 2007-2014 growth and isotopic shift. *Glob. Biogeochem. Cycles* **30**, 1356–1370 (2016).
- 379 [6] D. A. Stolper, A. Sessions, A. Ferreira, E. Santos Neto, A. Schimmelmann, S. Shusta,  
380 D. Valentine, J. Eiler, Combined  $^{13}\text{C}$ -D and D-D clumping in methane: Methods and pre-  
381 liminary results. *Geochim. Cosmochim. Acta* **126**, 169–191 (2014).
- 382 [7] D. T. Wang, D. S. Gruen, B. S. Lollar, K.-U. Hinrichs, L. C. Stewart, J. F. Holden, A. N. Hris-  
383 tov, J. W. Pohlman, P. L. Morrill, M. Könneke, K. B. Delwiche, E. P. Reeves, C. N. Sutcliffe,

- 384 D. J. Ritter, J. S. Seewald, J. C. McIntosh, H. F. Hemond, M. D. Kubo, D. Cardace, T. M.  
385 Hoehler, S. Ono, Nonequilibrium clumped isotope signals in microbial methane. *Science*  
386 **348**, 428–431 (2015).
- 387 [8] T. Okumura, S. Kawagucci, Y. Saito, Y. Matsui, K. Takai, H. Imachi, Hydrogen and carbon  
388 isotope systematics in hydrogenotrophic methanogenesis under H<sub>2</sub>-limited and H<sub>2</sub>-enriched  
389 conditions: Implications for the origin of methane and its isotopic diagnosis. *Prog. Earth*  
390 *Planet. Sci.* **3**, 14 (2016).
- 391 [9] X. Cao, H. Bao, Y. Peng, A kinetic model for isotopologue signatures of methane generated  
392 by biotic and abiotic CO<sub>2</sub> methanation. *Geochim. Cosmochim. Acta* **249**, 59–75 (2019).
- 393 [10] T. Wagner, U. Ermler, S. Shima, The methanogenic CO<sub>2</sub> reducing-and-fixing enzyme is bi-  
394 functional and contains 46 [4Fe-4S] clusters. *Science* **354**, 114–117 (2016).
- 395 [11] A.-K. Kaster, J. Moll, K. Parey, R. K. Thauer, Coupling of ferredoxin and heterodisulfide  
396 reduction via electron bifurcation in hydrogenotrophic methanogenic archaea. *PNAS* **108**,  
397 2981–6 (2011).
- 398 [12] L. M. I. de Poorter, W. J. Geerts, J. T. Keltjens, Hydrogen concentrations in methane-forming  
399 cells probed by the ratios of reduced and oxidized coenzyme F<sub>420</sub>. *Microbiology* **151**, 1697–  
400 1705 (2005).
- 401 [13] L. M. I. de Poorter, W. G. Geerts, A. P. R. Theuvenet, J. T. Keltjens, Bioenergetics of the  
402 formyl-methanofuran dehydrogenase and heterodisulfide reductase reactions in *Methanother-*  
403 *mobacter thermautotrophicus*. *Eur. J. Biochem.* **270**, 66–75 (2002).
- 404 [14] J. Bassham, G. Krause, Free energy changes and metabolic regulation in steady-state photo-  
405 synthetic carbon reduction. *Biochim. Biophys. Acta BBA - Bioenerg.* **189**, 207–221 (1969).
- 406 [15] D. A. Beard, H. Qian, Relationship between thermodynamic driving force and one-way fluxes  
407 in reversible processes. *PloS One* **2**, e144 (2007).

- 408 [16] E. Noor, A. Flamholz, W. Liebermeister, A. Bar-Even, R. Milo, A note on the kinetics of  
409 enzyme action: A decomposition that highlights thermodynamic effects. *FEBS Lett.* **587**,  
410 2772–7 (2013).
- 411 [17] C. Rees, A steady-state model for sulphur isotope fractionation in bacterial reduction pro-  
412 cesses. *Geochim. Cosmochim. Acta* **37**, 1141–1162 (1973).
- 413 [18] B. A. Wing, I. Halevy, Intracellular metabolite levels shape sulfur isotope fractionation during  
414 microbial sulfate respiration. *Proc. Natl. Acad. Sci. U. S. A.* **111**, 18116–25 (2014).
- 415 [19] D. L. Valentine, A. Chidthaisong, A. Rice, W. S. Reeburgh, S. C. Tyler, Carbon and hydrogen  
416 isotope fractionation by moderately thermophilic methanogens. *Geochim. Cosmochim. Acta*  
417 **68**, 1571–1590 (2004).
- 418 [20] H. Penning, C. M. Plugge, P. E. Galand, R. Conrad, Variation of carbon isotope fractionation  
419 in hydrogenotrophic methanogenic microbial cultures and environmental samples at different  
420 energy status. *Glob. Change Biol.* **11**, 2103–2113 (2005).
- 421 [21] K. Takai, K. Nakamura, T. Toki, U. Tsunogai, M. Miyazaki, J. Miyazaki, H. Hirayama,  
422 S. Nakagawa, T. Nunoura, K. Horikoshi, Cell proliferation at 122 degrees C and isotopically  
423 heavy CH<sub>4</sub> production by a hyperthermophilic methanogen under high-pressure cultivation.  
424 *Proc. Natl. Acad. Sci. U. S. A.* **105**, 10949–54 (2008).
- 425 [22] S. Hattori, H. Nashimoto, H. Kimura, K. Koba, K. Yamada, M. Shimizu, H. Watan-  
426 abe, M. Yoh, N. Yoshida, Hydrogen and carbon isotope fractionation by thermophilic hy-  
427 drogenotrophic methanogens from a deep aquifer under coculture with fermenters. *Geochem.*  
428 *J.* **46**, 193–200 (2012).
- 429 [23] B. D. Topçuoğlu, C. Meydan, T. B. Nguyen, S. Q. Lang, J. F. Holden, Growth Kinetics,  
430 Carbon Isotope Fractionation, and Gene Expression in the Hyperthermophile Methanocal-  
431 dococcus jannaschii during Hydrogen-Limited Growth and Interspecies Hydrogen Transfer.  
432 *Appl. Environ. Microbiol.* **85**, 1–14 (2019).

- 433 [24] S. Scheller, M. Goenrich, R. K. Thauer, B. Jaun, Methyl-coenzyme M reductase from  
434 methanogenic archaea: Isotope effects on the formation and anaerobic oxidation of methane.  
435 *J. Am. Chem. Soc.* **135**, 14975–84 (2013).
- 436 [25] J. Gropp, M. A. Iron, I. Halevy, Theoretical estimates of equilibrium carbon and hydrogen iso-  
437 tope effects in microbial methane production and anaerobic oxidation of methane. *Geochim-*  
438 *ica et Cosmochimica Acta* **295**, 237–264 (2021).
- 439 [26] H. M. Miller, N. Chaudhry, M. E. Conrad, M. Bill, S. H. Kopf, A. S. Templeton, Large carbon  
440 isotope variability during methanogenesis under alkaline conditions. *Geochim. Cosmochim.*  
441 *Acta* **237**, 18–31 (2018).
- 442 [27] D. B. Nothaft, A. S. Templeton, J. H. Rhim, D. T. Wang, J. Labidi, H. M. Miller, E. S. Boyd,  
443 J. M. Matter, S. Ono, E. D. Young, S. H. Kopf, P. B. Kelemen, M. E. Conrad, Geochemical,  
444 biological and clumped isotopologue evidence for substantial microbial methane production  
445 under carbon limitation in serpentinites of the Samail Ophiolite, Oman. *J. Geophys. Res.*  
446 *Biogeosciences* **NA**, e2020JG006025 (2021).
- 447 [28] H. Yoshioka, S. Sakata, Y. Kamagata, Hydrogen isotope fractionation by Methanothermobac-  
448 ter thermoautotrophicus in coculture and pure culture conditions. *Geochim. Cosmochim. Acta*  
449 **72**, 2687–2694 (2008).
- 450 [29] S. Kawagucci, M. Kobayashi, S. Hattori, K. Yamada, Y. Ueno, K. Takai, N. Yoshida, Hydro-  
451 gen isotope systematics among H<sub>2</sub>–H<sub>2</sub>O–CH<sub>4</sub> during the growth of the hydrogenotrophic  
452 methanogen Methanothermobacter thermoautotrophicus strain ΔH. *Geochim. Cosmochim.*  
453 *Acta* **142**, 601–614 (2014).
- 454 [30] C. Afting, E. Kremmer, C. Brucker, A. Hochheimer, R. K. Thauer, Regulation of the synthesis  
455 of H<sub>2</sub>-forming methylenetetrahydromethanopterin dehydrogenase (Hmd) and of HmdII and  
456 HmdIII in Methanothermobacter marburgensis. *Arch. Microbiol.* **174**, 225–232 (2000).

- 457 [31] R. Botz, H. D. Pokojski, M. Schmitt, M. Thomm, Carbon isotope fractionation during bacte-  
458 rial methanogenesis by CO<sub>2</sub> reduction. *Org. Geochem.* **25**, 255–262 (1996).
- 459 [32] P. M. Douglas, D. A. Stolper, J. M. Eiler, A. L. Sessions, M. Lawson, Y. Shuai, A. Bishop,  
460 O. G. Podlaha, A. A. Ferreira, E. V. Santos Neto, M. Niemann, A. S. Steen, L. Huang,  
461 L. Chimiak, D. L. Valentine, J. Fiebig, A. J. Luhmann, W. E. Seyfried, G. Etiope, M. Schoell,  
462 W. P. Inskeep, J. J. Moran, N. Kitchen, Methane clumped isotopes: Progress and potential for  
463 a new isotopic tracer. *Org. Geochem.* **113**, 262–282 (2017).
- 464 [33] D. A. Stolper, A. Martini, M. Clog, P. Douglas, S. Shusta, D. Valentine, A. Sessions, J. Eiler,  
465 Distinguishing and understanding thermogenic and biogenic sources of methane using multi-  
466 ply substituted isotopologues. *Geochim. Cosmochim. Acta* **161**, 219–247 (2015).
- 467 [34] L. Y. Yeung, Combinatorial effects on clumped isotopes and their significance in biogeochem-  
468 istry. *Geochim. Cosmochim. Acta* **172**, 22–38 (2016).
- 469 [35] T. Röckmann, M. E. Popa, M. C. Krol, M. E. G. Hofmann, Statistical clumped isotope signa-  
470 tures. *Sci. Rep.* **6**, 31947 (2016).
- 471 [36] L. Taenzer, J. Labidi, A. L. Masterson, X. Feng, D. Rumble, E. D. Young, W. D. Leavitt,  
472 Low  $\Delta^{12}\text{CH}_2\text{D}_2$  values in microbialgenic methane result from combinatorial isotope effects.  
473 *Geochimica et Cosmochimica Acta* **285**, 225–236 (2020).
- 474 [37] D. S. Vinson, N. E. Blair, A. M. Martini, S. Larter, W. H. Orem, J. C. McIntosh, Microbial  
475 methane from in situ biodegradation of coal and shale: A review and reevaluation of hydrogen  
476 and carbon isotope signatures. *Chem. Geol.* **453**, 128–145 (2017).
- 477 [38] A. C. Turner, R. Korol, D. L. Eldridge, M. Bill, M. E. Conrad, T. F. Miller, D. A. Stolper,  
478 Experimental and theoretical determinations of hydrogen isotopic equilibrium in the system  
479 CH<sub>4</sub>-H<sub>2</sub>-H<sub>2</sub>O from 3 to 200°C. *Geochimica et Cosmochimica Acta* **NA**, NA (2021).

- 480 [39] J. J. Jautzy, P. M. J. Douglas, H. Xie, J. M. Eiler, I. D. Clark, CH<sub>4</sub> isotopic ordering records  
481 ultra-slow hydrocarbon biodegradation in the deep subsurface. *Earth and Planetary Science*  
482 *Letters* **562**, 116841 (2021).
- 483 [40] N. Zhang, G. T. Snyder, M. Lin, M. Nakagawa, A. Gilbert, N. Yoshida, R. Matsumoto,  
484 Y. Sekine, Doubly substituted isotopologues of methane hydrate (<sup>13</sup>CH<sub>3</sub>D and <sup>12</sup>CH<sub>2</sub>D<sub>2</sub>):  
485 Implications for methane clumped isotope effects, source apportionments and global hydrate  
486 reservoirs. *Geochimica et Cosmochimica Acta* **NA**, NA (2021).
- 487 [41] R. Conrad, T. J. Phelps, J. G. Zeikus, Gas metabolism evidence in support of the juxtaposition  
488 of hydrogen-producing and methanogenic bacteria in sewage sludge and lake sediments. *Appl.*  
489 *Environ. Microbiol.* **50**, 595–601 (1985).
- 490 [42] E. Giraldo-Gomez, S. Goodwin, M. S. Switzenbaum, Influence of mass transfer limitations  
491 on determination of the half saturation constant for hydrogen uptake in a mixed-culture CH<sub>4</sub>-  
492 producing enrichment. *Biotechnol. Bioeng.* **40**, 768–76 (1992).
- 493 [43] Y.-S. Lin, V. B. Heuer, T. Goldhammer, M. Y. Kellermann, M. Zabel, K.-U. Hinrichs, Towards  
494 constraining H<sub>2</sub> concentration in subseafloor sediment: A proposal for combined analysis by  
495 two distinct approaches. *Geochimica et Cosmochimica Acta* **77**, 186–201 (2012).
- 496 [44] A. M. Zyakun, Potential of <sup>13</sup>C/<sup>12</sup>C Variations in Bacterial Methane in Assessing Origin of  
497 Environmental Methane. *Hydrocarbon Migration And Its Near-Surface Expression*, D. Schu-  
498 macher, M. A. Abrams, eds. (AAPG Special Volumes, 1996), pp. 341–352.
- 499 [45] J. A. Bradley, S. Arndt, J. P. Amend, E. Burwicz, A. W. Dale, M. Egger, D. E. LaRowe,  
500 Widespread energy limitation to life in global subseafloor sediments. *Sci. Adv.* **6**, eaba0697  
501 (2020).
- 502 [46] C. K. Paull, T. D. Lorenson, W. S. Borowski, W. Ussler III, K. Olsen, N. M. Rodriguez,  
503 Isotopic Composition of CH<sub>4</sub>, CO<sub>2</sub> Species, and Sedimentary Organic Matter Within Samples

504 From the Blake Ridge: Gas Source Implications. *Proc. Ocean Drill. Program Sci. Results*  
505 **164**, 67–78 (2000).

506 [47] J. W. Pohlman, M. Kaneko, V. B. Heuer, R. B. Coffin, M. Whiticar, Methane sources and  
507 production in the northern Cascadia margin gas hydrate system. *Earth and Planetary Science*  
508 *Letters* **287**, 504–512 (2009).

509 [48] G. Wegener, J. Gropp, H. Taubner, I. Halevy, M. Elvert, Sulfate-dependent reversibility of  
510 intracellular reactions explains the opposing isotope effects in the anaerobic oxidation of  
511 methane. *Sci. Adv.* **7**, eabe4939 (2021).

512 [49] J. Gropp, M. A. Iron, I. Halevy, Corrigendum to “Theoretical estimates of equilibrium carbon  
513 and hydrogen isotope effects in microbial methane production and anaerobic oxidation of  
514 methane” [Geochim. Cosmochim. Acta 295 (2021) 237–264]. *Geochimica et Cosmochimica*  
515 *Acta* **306**, 386–389 (2021).

516 [50] R. M. Morgan, T. D. Pihl, J. Nölling, J. N. Reeve, Hydrogen regulation of growth, growth  
517 yields, and methane gene transcription in *Methanobacterium thermoautotrophicum* deltaH. *J.*  
518 *Bacteriol.* **179**, 889–98 (1997).

519 [51] J. N. Reeve, J. Nölling, R. M. Morgan, D. R. Smith, Methanogenesis: Genes, genomes, and  
520 who’s on first? *J. Bacteriol.* **179**, 5975–86 (1997).

521 [52] P. Vermeij, J. L. Pennings, S. M. Maassen, J. T. Keltjens, G. D. Vogels, Cellular levels of factor  
522 390 and methanogenic enzymes during growth of *Methanobacterium thermoautotrophicum*  
523 deltaH. *J. Bacteriol.* **179**, 6640–8 (1997).

524 [53] J. L. Pennings, P. Vermeij, L. M. de Poorter, J. T. Keltjens, G. D. Vogels, Adaptation of  
525 methane formation and enzyme contents during growth of *Methanobacterium thermoau-*  
526 *trophicum* (strain  $\Delta$ H) in a fed-batch fermentor. *Antonie Van Leeuwenhoek* **77**, 281–291  
527 (2000).



- 528 [54] E. L. Hendrickson, A. K. Haydock, B. C. Moore, W. B. Whitman, J. A. Leigh, Functionally  
529 distinct genes regulated by hydrogen limitation and growth rate in methanogenic Archaea.  
530 *Proc. Natl. Acad. Sci. U. S. A.* **104**, 8930–4 (2007).
- 531 [55] S. Kato, T. Kosaka, K. Watanabe, Comparative transcriptome analysis of responses of  
532 *Methanothermobacter thermoautotrophicus* to different environmental stimuli. *Environ. Mi-*  
533 *crobiol.* **10**, 893–905 (2008).
- 534 [56] Q. Xia, T. Wang, E. L. Hendrickson, T. J. Lie, M. Hackett, J. A. Leigh, Quantitative pro-  
535 teomics of nutrient limitation in the hydrogenotrophic methanogen *Methanococcus mari-*  
536 *paludis*. *BMC Microbiol.* **9**, 149 (2009).
- 537 [57] M. Enoki, N. Shinzato, H. Sato, K. Nakamura, Y. Kamagata, Comparative Proteomic Analysis  
538 of *Methanothermobacter thermoautotrophicus*  $\Delta$ H in Pure Culture and in Co-Culture with a  
539 Butyrate-Oxidizing Bacterium. *PLoS ONE* **6**, e24309 (2011).
- 540 [58] T. D. Pihl, S. Sharma, J. N. Reeve, Growth phase-dependent transcription of the  
541 genes that encode the two methyl coenzyme M reductase isoenzymes and N5-  
542 methyltetrahydromethanopterin:coenzyme M methyltransferase in *Methanobacterium ther-*  
543 *moautotrophicum* delta H. *J. Bacteriol.* **176**, 6384–6391 (1994).
- 544 [59] L. G. Bonacker, S. Baudner, R. K. Thauer, Differential expression of the two methyl-  
545 coenzyme M reductases in *Methanobacterium thermoautotrophicum* as determined immuno-  
546 chemically via isoenzyme-specific antisera. *Eur. J. Biochem.* **206**, 87–92 (1992).
- 547 [60] L. G. Bonacker, S. Baudner, E. Mörschel, R. Böcher, R. K. Thauer, Properties of the two  
548 isoenzymes of methyl-coenzyme M reductase in *Methanobacterium thermoautotrophicum*.  
549 *Eur. J. Biochem.* **217**, 587–95 (1993).
- 550 [61] M. Dey, X. Li, R. C. Kunz, S. W. Ragsdale, Detection of Organometallic and Radical Inter-  
551 mediates in the Catalytic Mechanism of Methyl-Coenzyme M Reductase Using the Natural

552 Substrate Methyl-Coenzyme M and a Coenzyme B Substrate Analogue. *Biochemistry* **49**,  
553 10902–10911 (2010).

554 [62] M. A. Lever, K. L. Rogers, K. G. Lloyd, J. Overmann, B. Schink, R. K. Thauer, T. M. Hoehler,  
555 B. B. Jørgensen, Life under extreme energy limitation: A synthesis of laboratory- and field-  
556 based investigations. *FEMS Microbiol Rev* **39**, 688–728 (2015).
